# Supplementary material for: One in five patients with rapidly and persistently controlled early rheumatoid arthritis report poor well-being after 1 year of treatment
Source: PubMed Central journal article supplement — RMD Open. 2020 Apr 28;6(1):e001146. doi: 10.1136/rmdopen-2019-001146 (PMC7299515; doi:10.1136/rmdopen-2019-001146), 2020-04-28
Supplement: rmdopen-2019-001146s002.pdf [file rmdopen-2019-001146s002.pdf]

## Supplementary file 2. Sensitivity analyses

**Table 1a.** Scores of the 5 patient-reported outcomes after 1 year of RA treatment used to assign patients with an early and persistent treatment response to a cluster (n=140)

| PRO scores at year 1              | Concordant to disease activity cluster |                                            | Dominant fatigue cluster    |                                          | Dominant pain and fatigue cluster |                                         |
|-----------------------------------|----------------------------------------|--------------------------------------------|-----------------------------|------------------------------------------|-----------------------------------|-----------------------------------------|
|                                   | n=109 <sup>a</sup><br>(77.9%)          | <b>n=118<sup>b</sup></b><br><b>(84.3%)</b> | n=13 <sup>a</sup><br>(9.3%) | <b>n=13<sup>b</sup></b><br><b>(9.3%)</b> | n=18 <sup>a</sup><br>(12.9%)      | <b>n=9<sup>b</sup></b><br><b>(6.4%)</b> |
| Pain (0-100)                      | 7.3±7.5                                | <b>9.4±10.5</b>                            | 14.5±8.9                    | <b>14.5±8.9</b>                          | 45.1±14.6                         | <b>55.7±10.9</b>                        |
| Fatigue (0-100)                   | 10.0±9.9                               | <b>11.8±11.8</b>                           | 69.6±14.3                   | <b>69.6±14.3</b>                         | 42.4±14.0                         | <b>51.0±11.7</b>                        |
| Physical functioning (0-3)        | 0.1±0.1                                | <b>0.1±0.2</b>                             | 0.2±0.3                     | <b>0.2±0.3</b>                           | 0.3±0.3                           | <b>0.2±0.3</b>                          |
| RA-related quality of life (0-30) | 3.9±4.9                                | <b>4.1±4.9</b>                             | 6.2±2.4                     | <b>6.2±2.4</b>                           | 5.6±5.0                           | <b>5.3±5.1</b>                          |
| Sleep quality (0-21)              | 5.0±3.0                                | <b>5.0±3.0</b>                             | 6.0±1.9                     | <b>6.1±1.9</b>                           | 5.4±2.6                           | <b>5.3±2.3</b>                          |

*Note.* Values reported are mean± standard deviation. <sup>a</sup> Cluster analysis based on k-means clustering; <sup>b</sup> Sensitivity analyses by hierarchical clustering using the median method with squared Euclidean distance. RA: Rheumatoid arthritis. Higher scores indicate worse pain, worse fatigue, more functional loss, worse health-related quality of life and worse sleep quality. Early and persistent response was defined as a DAS28CRP<2.6 at week 16, sustained between week 16 and week 52. PRO: Patient-reported outcome.

**Table 1b.** Plotting membership between k-means and hierarchical clustering

|              |           | k-means   |          |          |
|--------------|-----------|-----------|----------|----------|
|              |           | CL1 n=109 | CL2 n=18 | CL3 n=13 |
| hierarchical | CL1 n=118 | 92.5%     | 7.5%     | 0.0%     |
|              | CL2 n=9   | 0.0%      | 100.0%   | 0.0%     |
|              | CL3 n=13  | 0.0%      | 0.0%     | 100.0%   |
| Total        |           | 100.0%    | 100.0%   | 100.0%   |

**Table 2a.** Plotting membership between k-means (imputed) and k-means (non-imputed)

|                     |          | k-means imputed |          |          |
|---------------------|----------|-----------------|----------|----------|
|                     |          | CL1 n=87        | CL2 n=12 | CL3 n=10 |
| k-means not imputed | CL1 n=87 | 100%            | 0.0%     | 0.0%     |
|                     | CL2 n=11 | 0.0%            | 100.0%   | 0.0%     |
|                     | CL3 n=11 | 0.0%            | 9.1%     | 90.9%    |
| Total               |          | 100.0%          | 100.0%   | 100.0%   |

CL1: concordant to disease activity cluster; CL2: dominant pain and fatigue cluster; CL3: dominant fatigue cluster.

**Table 2b.** Plotting membership between hierarchical-median (imputed) and hierarchical-median (non-imputed)

|                                 |          | hierarchical-median imputed |         |          |
|---------------------------------|----------|-----------------------------|---------|----------|
|                                 |          | CL1 n=93                    | CL2 n=5 | CL3 n=11 |
| hierarchical-median not imputed | CL1 n=92 | 98.9%                       | 0.0%    | 0.0%     |
|                                 | CL2 n=6  | 1.1%                        | 100.0%  | 0.0%     |
|                                 | CL3 n=11 | 0.0%                        | 0.0%    | 100.0%   |
| Total                           |          | 100.0%                      | 100.0%  | 100.0%   |

CL1: concordant to disease activity cluster; CL2: dominant pain and fatigue cluster; CL3: dominant fatigue cluster.
