# Supplementary material for: One in five patients with rapidly and persistently controlled early rheumatoid arthritis report poor well-being after 1 year of treatment
Source: PubMed Central journal article supplement — RMD Open. 2020 Apr 28;6(1):e001146. doi: 10.1136/rmdopen-2019-001146 (PMC7299515; doi:10.1136/rmdopen-2019-001146), 2020-04-28
Supplement: rmdopen-2019-001146s003.pdf [file rmdopen-2019-001146s003.pdf]

**Supplementary file 3.** Mean scores of the patient-reported outcomes at week 16 organized for each cluster

| Week 16 variables                    | Concordant to<br>disease activity<br>cluster<br>(n=109) | Dominant<br>fatigue<br>cluster<br>(n=13) | Dominant pain<br>and fatigue<br>cluster<br>(n=18) |
|--------------------------------------|---------------------------------------------------------|------------------------------------------|---------------------------------------------------|
| <b>Wellbeing indicators</b>          |                                                         |                                          |                                                   |
| Pain (0-100)                         | 9.6±10.3                                                | 11.7±11.6                                | 26.6±21.2                                         |
| Fatigue (0-100)                      | 16.0±16.6                                               | 41.9±32.3                                | 30.2±15.6                                         |
| Physical functioning (0-3)           | 0.1±0.2                                                 | 0.1±0.2                                  | 0.1±0.2                                           |
| RA quality of life (0-30)            | 3.4±3.7                                                 | 4.5±3.4                                  | 3.8±2.8                                           |
| Sleep quality (0-21)                 | 5.2±3.0                                                 | 6.0±2.9                                  | 4.6±1.4                                           |
| <b>Coping strategies</b>             |                                                         |                                          |                                                   |
| Active tackling (7-28)               | 17.1±3.7                                                | 16.6±4.1                                 | 17.5±2.9                                          |
| Seeking social support (6-24)        | 11.8±2.9                                                | 13.2±2.2                                 | 12.9±2.7                                          |
| Expressing emotions (3-12)           | 6.0±1.7                                                 | 5.7±1.4                                  | 6.0±1.5                                           |
| Fostering reassuring thoughts (5-20) | 12.3±2.5                                                | 12.4±1.9                                 | 13.1±2.0                                          |
| Avoidance (8-32)                     | 14.2±3.0                                                | 15.9±3.3                                 | 15.4±2.4                                          |
| Passive reacting (7-28)              | 10.8±3.0                                                | 11.2±2.4                                 | 10.9±3.1                                          |
| Palliative response (8-32)           | 15.9±3.3                                                | 16.5±3.4                                 | 15.7±3.2                                          |
| <b>Illness perceptions</b>           |                                                         |                                          |                                                   |
| Identity (0-15)                      | 3.3±2.5                                                 | 4.8±2.0                                  | 3.9±2.0                                           |
| Consequences (6-30)                  | 16.1±4.6                                                | 16.7±3.4                                 | 17.6±3.1                                          |

|                                                 |           |           |           |
|-------------------------------------------------|-----------|-----------|-----------|
| Timeline acute/chronic (6-30)                   | 22.5±4.9  | 24.9±3.8  | 22.8±2.9  |
| Personal control (6-30)                         | 19.0±3.5  | 19.7±2.8  | 18.7±2.5  |
| Treatment control (5-25)                        | 19.4±2.4  | 17.9±2.8  | 19.4±2.4  |
| Illness coherence (5-25)                        | 18.1±3.6  | 18.2±3.8  | 18.3±3.6  |
| Timeline cyclical (4-20)                        | 11.5±3.9  | 11.8±3.5  | 13.0±3.0  |
| Emotional representations (6-30)                | 14.5±5.6  | 16.0±3.8  | 15.4±4.6  |
| Psychological attributions (6-30)               | 12.9±4.1  | 12.3±2.9  | 12.1±4.6  |
| Risk factors (7-35)                             | 15.7±3.7  | 16.3±3.3  | 16.7±4.0  |
| Immunity (3-15)                                 | 7.0±1.9   | 7.7±1.5   | 8.0±1.6   |
| Accident (1-5)                                  | 1.9±0.9   | 1.8±0.7   | 1.9±0.8   |
| Chance (1-5)                                    | 3.4±1.1   | 3.5±1.0   | 3.4±1.1   |
| <b>Social support</b>                           |           |           |           |
| Positive interactions (34-136)                  | 74.6±14.2 | 74.0±11.8 | 77.0±17.3 |
| Negative interactions (7-28)                    | 8.8±2.2   | 9.4±3.0   | 8.6±1.8   |
| Discrepancies: excessive support<br>(0-34)      | 0.9±2.2   | 0.8±1.0   | 0.4±0.8   |
| Discrepancies: insufficient support<br>(34-102) | 42.3±10.9 | 44.1±10.9 | 40.4±6.8  |

---

*Note.* Values reported are mean± standard deviation.
